# Supplementary material for: The association between cervical degenerative MRI findings and self-reported neck pain, disability and headache: a cross-sectional exploratory study
Source: Springer Nature journal article supplement (doi:10.1186/s12998-023-00517-w), 2023-10-11

Additional file 1. Number of cervical degenerative MRI findings, stratified by neck pain, neck disability and headache, and graphical representation of the distribution of outcomes and age

Table S1: Number of cervical degenerative MRI findings at individual level, stratified by neck pain, neck disability and headache.

| MRI findings              | Moderate or severe neck pain |           | Moderate or severe neck disability |           | Headache |           |
|---------------------------|------------------------------|-----------|------------------------------------|-----------|----------|-----------|
|                           | No n=415                     | Yes n=183 | No n=190                           | Yes n=274 | No n=272 | Yes n=194 |
| Any of the findings below | 134 (32)                     | 77 (42)   | 57 (30)                            | 107 (39)  | 99 (37)  | 65 (34)   |
| Any VESC                  | 27 (7)                       | 17 (9)    | 6 (3)                              | 27 (10)   | 19 (7)   | 14 (7)    |
| <i>Small</i>              | 23 (6)                       | 15 (8)    | 5 (3)                              | 24 (9)    | 16 (6)   | 13 (7)    |
| <i>Medium</i>             | 4 (1)                        | 2 (1)     | 2 (1)                              | 3 (1)     | 5 (2)    | 0         |
| <i>Large</i>              | 8 (2)                        | 2 (1)     | 3 (2)                              | 5 (2)     | 7 (3)    | 1 (1)     |
| Any disc degeneration     | 133 (32)                     | 77 (42)   | 57 (30)                            | 107 (39)  | 99 (37)  | 65 (34)   |
| <i>Mild</i>               | 127 (31)                     | 75 (41)   | 56 (29)                            | 102 (37)  | 97 (36)  | 61 (32)   |
| <i>Moderate</i>           | 11 (3)                       | 7 (4)     | 5 (3)                              | 10 (4)    | 8 (3)    | 7 (4)     |
| <i>Severe</i>             | 1 (0)                        | 1 (1)     | 0                                  | 2 (1)     | 1 (0)    | 1 (1)     |
| Any disc contour changes  | 130 (31)                     | 74 (40)   | 56 (29)                            | 103 (38)  | 96 (35)  | 63 (33)   |
| <i>Protrusions</i>        | 121 (29)                     | 71 (30)   | 53 (28)                            | 95 (35)   | 91 (34)  | 57 (30)   |
| <i>Extrusion</i>          | 13 (3)                       | 5 (3)     | 7 (4)                              | 9 (3)     | 8 (3)    | 8 (4)     |
| <i>Sequestration</i>      | 0                            | 0         | 0                                  | 0         | 0        | 0         |

Values are numbers with percentages in brackets.

N<sub>Total</sub>=600, Multiple spinal levels of a participant may be counted in several categories. Therefore, the total prevalence may not equal the sum of the prevalence rates for an MRI finding.

VESC: vertebral endplate signal changes

Figure S1: Distribution of neck pain intensity

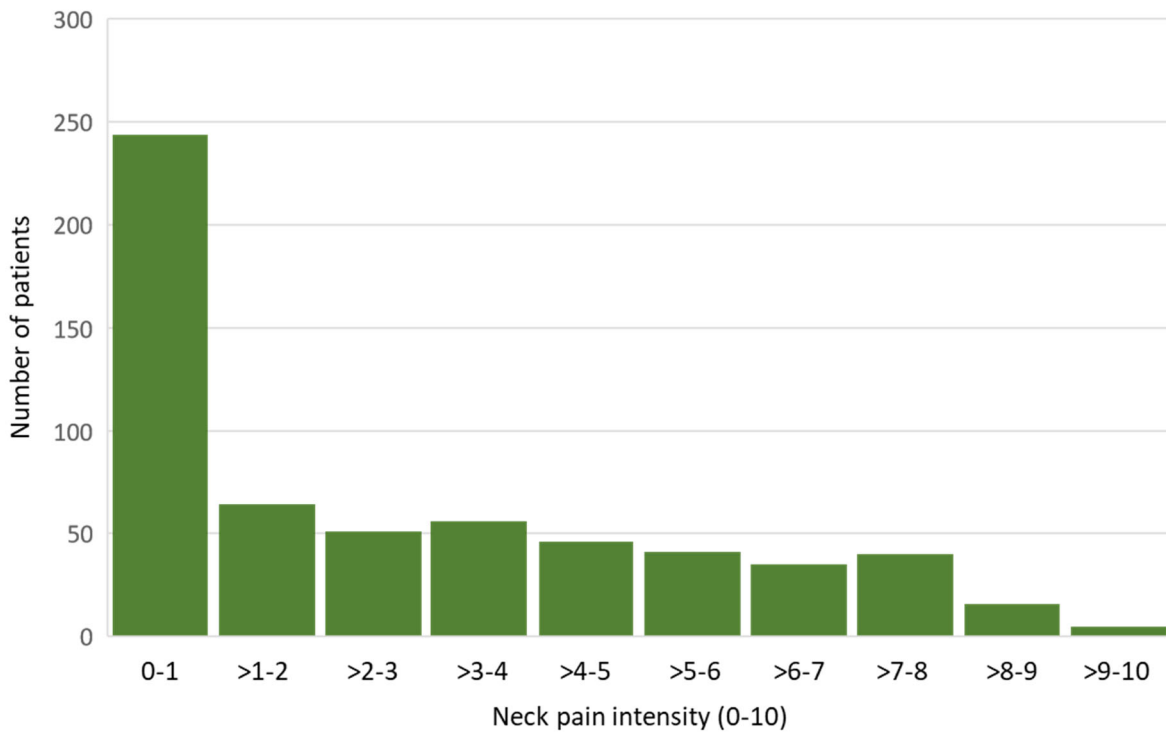

Figure S2: Distribution of the Neck Disability Index

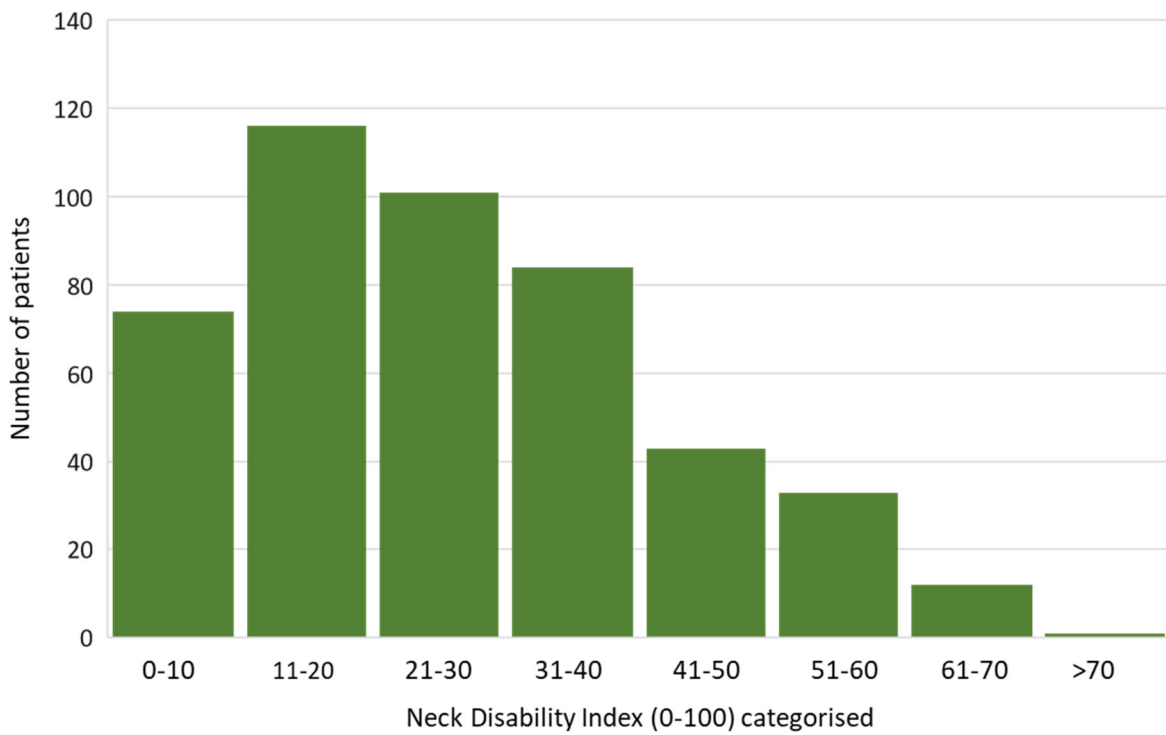

Figure S3: Distribution of responses to the headache item in the Neck Disability Index

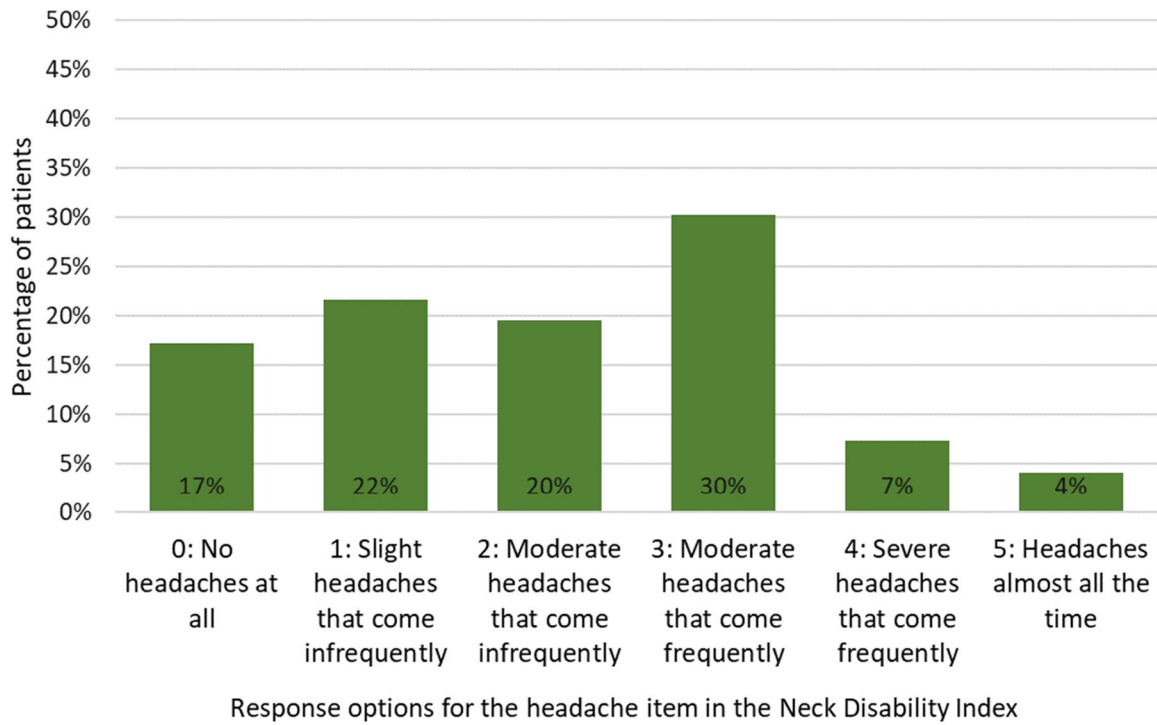

Figure S4: Distribution of age

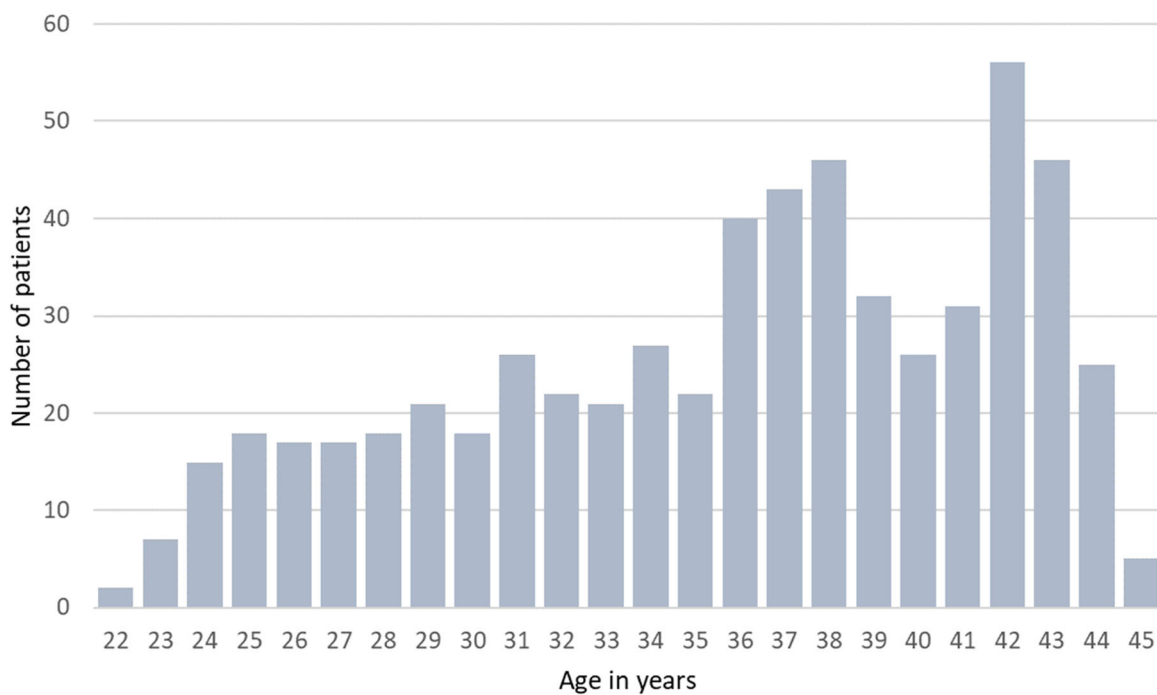

Supplement: MOESM1 [file 26152190]
